# Supplementary material for: Genome-Wide Analysis of the Growth-Regulating Factor (GRF) Family in Aquatic Plants and Their Roles in the ABA-Induced Turion Formation of Spirodela polyrhiza
Source: MDPI journal article supplement (doi:10.3390/ijms231810485), 2022-09-10
Supplement: s1 [file s1]

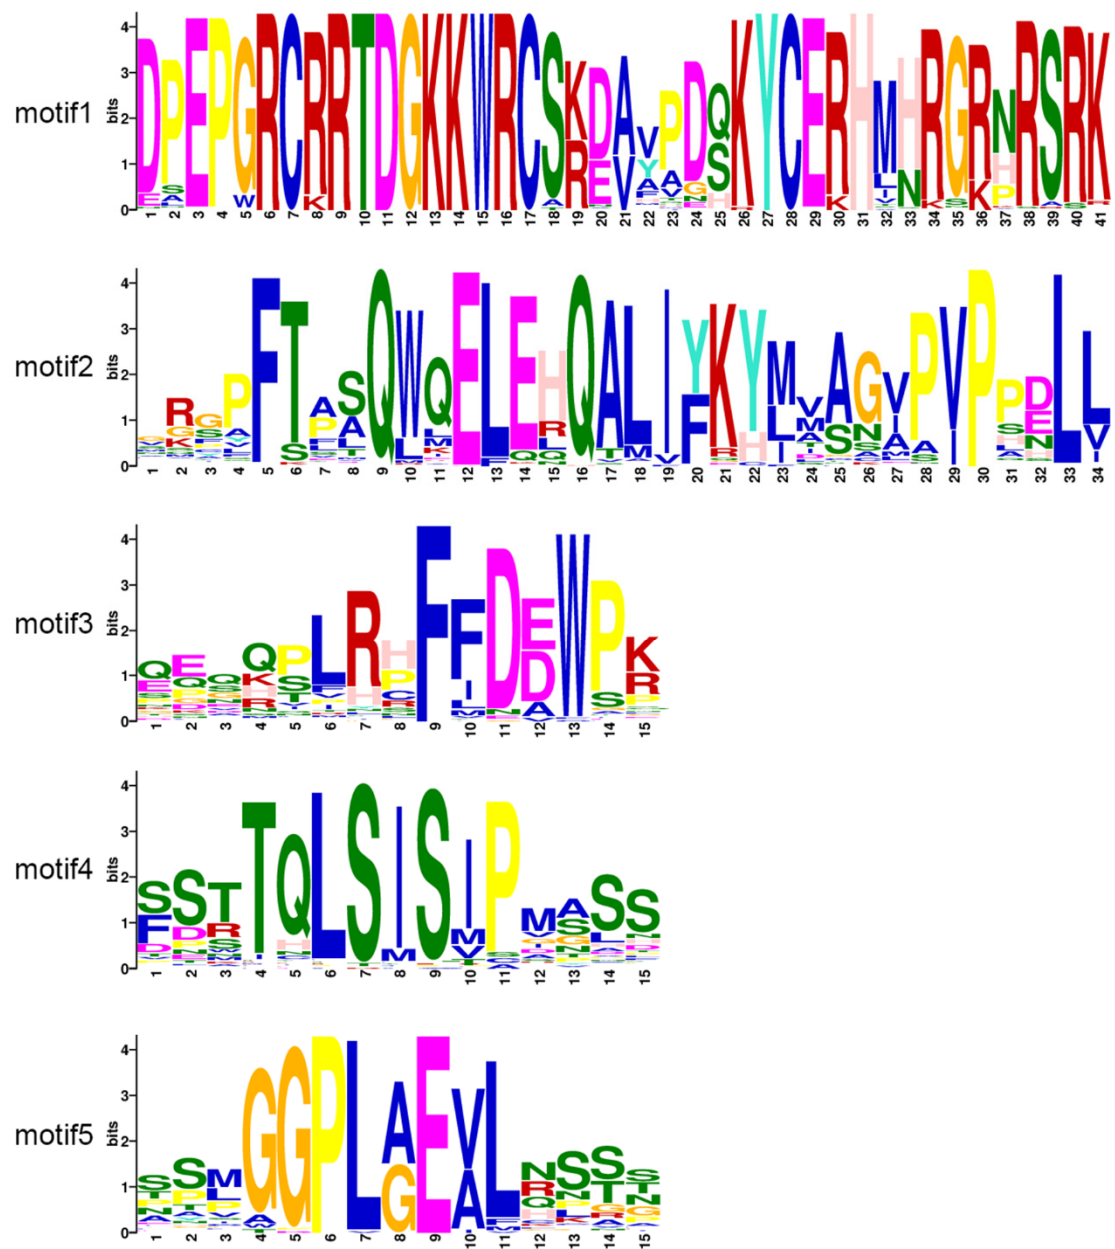

**Figure S1.** Characteristics of five putative conserved motifs in 139 GRFs.

**Table S1.** Gene information, predicted putative physiochemical properties, NLSs and subcellular localizations of 139 GRF proteins.

| Gene name | Gene ID            | Species                     | Protein length (aa) | MW(KDa)  | PI   | Predicted subcellular localization | Predicted monopartite NLS (position) | Predicted bipartite NLS (position) |
|-----------|--------------------|-----------------------------|---------------------|----------|------|------------------------------------|--------------------------------------|------------------------------------|
| AfGR F1   | Azfi_s0001.g00094  | <i>Azolla filiculoides</i>  | 625                 | 67.1502  | 6.61 | Nucleus                            | -                                    | 273                                |
| AfGR F2   | Azfi_s0097.g043820 | <i>Azolla filiculoides</i>  | 801                 | 82.10981 | 6.66 | Nucleus                            | -                                    | 239                                |
| AfGR F3   | Azfi_s0256.g060519 | <i>Azolla filiculoides</i>  | 818                 | 87.30616 | 6.72 | Nucleus                            | -                                    | 372                                |
| AtGR F1   | AT2G22840          | <i>Arabidopsis thaliana</i> | 530                 | 56.40134 | 9.27 | Nucleus                            | -                                    | 201; 325; 348                      |
| AtGR F2   | AT4G37740          | <i>Arabidopsis thaliana</i> | 535                 | 58.58489 | 8.85 | Nucleus                            | -                                    | 232; 256; 440                      |
| AtGR F3   | AT2G36400          | <i>Arabidopsis thaliana</i> | 398                 | 43.70729 | 8.56 | Nucleus                            | -                                    | 4; 149                             |
| AtGR F4   | AT3G52910          | <i>Arabidopsis thaliana</i> | 380                 | 42.53372 | 6.87 | Nucleus                            | -                                    | 156; 250                           |
| AtGR F5   | AT3G13960          | <i>Arabidopsis thaliana</i> | 397                 | 44.69557 | 8.18 | Nucleus                            | -                                    | 86                                 |
| AtGR F6   | AT2G06200          | <i>Arabidopsis thaliana</i> | 244                 | 28.21061 | 8.87 | Nucleus                            | -                                    | 85; 196                            |
| AtGR F7   | AT5G53660          | <i>Arabidopsis thaliana</i> | 365                 | 40.41032 | 8.13 | Nucleus                            | -                                    | 121; 140                           |
| AtGR F8   | AT4G24150          | <i>Arabidopsis thaliana</i> | 493                 | 54.6087  | 6.44 | Nucleus                            | -                                    | -                                  |
| AtGR      | AT2G45480          | <i>Arabidopsis thaliana</i> | 429                 | 48.60    | 8.3  | Nucleus                            | -                                    | 92;                                |

|             |                    |                                            |                          |              |          |                                      |     |                     |
|-------------|--------------------|--------------------------------------------|--------------------------|--------------|----------|--------------------------------------|-----|---------------------|
| F9          |                    |                                            | <i>psis<br/>thaliana</i> | 757          | 5        | s                                    |     | 310                 |
| AvGR<br>F1  | Av_00000935-<br>RA | <i>Aldrova<br/>nda<br/>vesiculo<br/>sa</i> | 369                      | 41.65<br>316 | 8.7<br>7 | Nucleu<br>s                          | -   | 84;<br>263          |
| AvGR<br>F10 | Av_00011365-<br>RA | <i>Aldrova<br/>nda<br/>vesiculo<br/>sa</i> | 367                      | 41.17<br>092 | 8.7<br>2 | Nucleu<br>s                          | -   | 84;<br>263<br>265   |
| AvGR<br>F11 | Av_00013002-<br>RA | <i>Aldrova<br/>nda<br/>vesiculo<br/>sa</i> | 374                      | 41.99<br>66  | 9.1<br>1 | Nucleu<br>s                          | -   | 83                  |
| AvGR<br>F12 | Av_00013064-<br>RA | <i>Aldrova<br/>nda<br/>vesiculo<br/>sa</i> | 455                      | 49.98<br>494 | 8.5<br>5 | Nucleu<br>s                          | -   | 106;<br>115         |
| AvGR<br>F13 | Av_00014513-<br>RA | <i>Aldrova<br/>nda<br/>vesiculo<br/>sa</i> | 503                      | 53.02<br>958 | 8.5<br>8 | Nucleu<br>s                          | -   | -                   |
| AvGR<br>F14 | Av_00015655-<br>RA | <i>Aldrova<br/>nda<br/>vesiculo<br/>sa</i> | 355                      | 38.99<br>746 | 7.7      | Nucleu<br>s                          | 132 | 106;<br>130;<br>130 |
| AvGR<br>F15 | Av_00018870-<br>RA | <i>Aldrova<br/>nda<br/>vesiculo<br/>sa</i> | 541                      | 57.59<br>941 | 8.9<br>4 | Cell<br>membr<br>ane.<br>Nucleu<br>s | -   | 316                 |
| AvGR<br>F16 | Av_00018901-<br>RA | <i>Aldrova<br/>nda<br/>vesiculo<br/>sa</i> | 409                      | 44.18<br>537 | 9.1<br>1 | Nucleu<br>s                          | -   | 91                  |
| AvGR<br>F17 | Av_00020000-<br>RA | <i>Aldrova<br/>nda<br/>vesiculo<br/>sa</i> | 565                      | 60.05<br>906 | 8.1<br>1 | Cell<br>membr<br>ane                 | -   | -                   |
| AvGR<br>F18 | Av_00020017-<br>RA | <i>Aldrova<br/>nda<br/>vesiculo<br/>sa</i> | 229                      | 25.26<br>819 | 9.2<br>4 | Nucleu<br>s                          | -   | 79                  |
| AvGR        | Av_00022695-       | <i>Aldrova</i>                             | 601                      | 63.66        | 9.1      | Cell                                 | -   | 239;                |

|          |                |                            |     |              |                   |                                              |
|----------|----------------|----------------------------|-----|--------------|-------------------|----------------------------------------------|
| F19      | RA             | <i>Aladrova vesiculosa</i> | 055 | 7            | membrane. Nucleus | 263                                          |
| AvGR F2  | Av_00004307-RA | <i>Aladrova vesiculosa</i> | 362 | 40.49<br>102 | 8.9<br>4          | Nucleus - 85;<br>259                         |
| AvGR F20 | Av_00023828-RA | <i>Aladrova vesiculosa</i> | 410 | 44.91<br>37  | 6.3<br>3          | Nucleus - 179                                |
| AvGR F21 | Av_00024262-RA | <i>Aladrova vesiculosa</i> | 628 | 67.20<br>784 | 8.3<br>5          | Cell membrane. Nucleus - 266;<br>290;<br>392 |
| AvGR F3  | Av_00004572-RA | <i>Aladrova vesiculosa</i> | 406 | 45.10<br>23  | 8.9<br>2          | Nucleus - 42;<br>108;<br>265                 |
| AvGR F4  | Av_00007247-RA | <i>Aladrova vesiculosa</i> | 372 | 41.47<br>896 | 8.3<br>7          | Nucleus - 83                                 |
| AvGR F5  | Av_00009217-RA | <i>Aladrova vesiculosa</i> | 560 | 58.98<br>234 | 8.1<br>8          | Cell membrane - -                            |
| AvGR F6  | Av_00009484-RA | <i>Aladrova vesiculosa</i> | 543 | 57.48<br>387 | 7.5<br>2          | Cell membrane - 197;<br>302                  |
| AvGR F7  | Av_00009515-RA | <i>Aladrova vesiculosa</i> | 401 | 43.76<br>747 | 8.6<br>9          | Nucleus - 113                                |
| AvGR F8  | Av_00010330-RA | <i>Aladrova vesiculosa</i> | 518 | 55.06<br>272 | 7.5<br>8          | Nucleus - -                                  |
| AvGR F9  | Av_00010799-RA | <i>Aladrova vesiculosa</i> | 518 | 55.60<br>684 | 8.1<br>8          | Cell membrane. - 25;<br>202                  |

|             |                    |                               |     |              |          |                                  |   |             |
|-------------|--------------------|-------------------------------|-----|--------------|----------|----------------------------------|---|-------------|
|             |                    | <i>sa</i>                     |     |              |          | Nucleu<br>s                      |   |             |
| CcGR<br>F1  | GWHPACFD0<br>00460 | <i>Cladopus<br/>chinensis</i> | 329 | 35.87<br>144 | 5.3<br>2 | Cell<br>membrane.<br>Nucleu<br>s | - | 119;<br>128 |
| CcGR<br>F10 | GWHPACFD0<br>15113 | <i>Cladopus<br/>chinensis</i> | 271 | 30.69<br>875 | 8.2<br>7 | Nucleu<br>s                      | - | -           |
| CcGR<br>F11 | GWHPACFD0<br>22459 | <i>Cladopus<br/>chinensis</i> | 263 | 29.67<br>149 | 8.6<br>5 | Nucleu<br>s                      | - | 27;<br>113  |
| CcGR<br>F2  | GWHPACFD0<br>02369 | <i>Cladopus<br/>chinensis</i> | 356 | 39.23<br>585 | 8.0<br>2 | Nucleu<br>s                      | - | 170         |
| CcGR<br>F3  | GWHPACFD0<br>04174 | <i>Cladopus<br/>chinensis</i> | 272 | 30.10<br>859 | 8.7<br>1 | Nucleu<br>s                      | - | 137;<br>196 |
| CcGR<br>F4  | GWHPACFD0<br>05783 | <i>Cladopus<br/>chinensis</i> | 246 | 27.52<br>706 | 9.5<br>3 | Nucleu<br>s                      | - | 136         |
| CcGR<br>F5  | GWHPACFD0<br>07337 | <i>Cladopus<br/>chinensis</i> | 305 | 34.40<br>959 | 8.9      | Nucleu<br>s                      | - | 80; 89      |
| CcGR<br>F6  | GWHPACFD0<br>07888 | <i>Cladopus<br/>chinensis</i> | 246 | 27.48<br>202 | 9.4<br>4 | Nucleu<br>s                      | - | 136         |
| CcGR<br>F7  | GWHPACFD0<br>12264 | <i>Cladopus<br/>chinensis</i> | 382 | 42.74<br>732 | 9.3<br>5 | Nucleu<br>s                      | - | 103;<br>159 |
| CcGR<br>F8  | GWHPACFD0<br>12674 | <i>Cladopus<br/>chinensis</i> | 313 | 35.47<br>848 | 7.5<br>8 | Nucleu<br>s                      | - | 201         |
| CcGR        | GWHPACFD0          | <i>Cladopus</i>               | 270 | 30.95        | 6.1      | Nucleu                           | - | 77          |

|             |                |                                                                           |     |              |          |             |   |                   |
|-------------|----------------|---------------------------------------------------------------------------|-----|--------------|----------|-------------|---|-------------------|
| F9          | 14476          | <i>s</i><br><i>chinensi</i>                                               | 586 | 9            | s        |             |   |                   |
| CdG<br>RF1  | prefix00835.t1 | <i>s</i><br><i>Ceratop</i><br><i>hyllum</i><br><i>demersu</i><br><i>m</i> | 381 | 42.58<br>055 | 8.1<br>8 | Nucleu<br>s | - | 150;<br>159       |
| CdG<br>RF10 | prefix15436.t1 | <i>Ceratop</i><br><i>hyllum</i><br><i>demersu</i><br><i>m</i>             | 342 | 38.41<br>46  | 8.3<br>9 | Nucleu<br>s | - | 76                |
| CdG<br>RF11 | prefix17660.t1 | <i>Ceratop</i><br><i>hyllum</i><br><i>demersu</i><br><i>m</i>             | 403 | 44.98<br>444 | 5.6<br>9 | Nucleu<br>s | - | 134               |
| CdG<br>RF12 | prefix18448.t1 | <i>Ceratop</i><br><i>hyllum</i><br><i>demersu</i><br><i>m</i>             | 284 | 33.45<br>044 | 8.5<br>5 | Nucleu<br>s | - | 79;<br>88;<br>238 |
| CdG<br>RF13 | prefix21354.t1 | <i>Ceratop</i><br><i>hyllum</i><br><i>demersu</i><br><i>m</i>             | 323 | 36.36<br>829 | 7.6<br>4 | Nucleu<br>s | - | 61                |
| CdG<br>RF14 | prefix25051.t1 | <i>Ceratop</i><br><i>hyllum</i><br><i>demersu</i><br><i>m</i>             | 139 | 15.85<br>011 | 9.5<br>8 | Nucleu<br>s | - | 50                |
| CdG<br>RF2  | prefix01244.t1 | <i>Ceratop</i><br><i>hyllum</i><br><i>demersu</i><br><i>m</i>             | 433 | 47.84<br>98  | 6.5      | Nucleu<br>s | - | 16;<br>144        |
| CdG<br>RF3  | prefix04847.t1 | <i>Ceratop</i><br><i>hyllum</i><br><i>demersu</i><br><i>m</i>             | 541 | 60.72<br>992 | 6.4<br>4 | Nucleu<br>s | - | 251               |
| CdG<br>RF4  | prefix05720.t1 | <i>Ceratop</i><br><i>hyllum</i><br><i>demersu</i><br><i>m</i>             | 358 | 39.42<br>026 | 6.1<br>5 | Nucleu<br>s | - | -                 |
| CdG<br>RF5  | prefix06054.t1 | <i>Ceratop</i><br><i>hyllum</i><br><i>demersu</i><br><i>m</i>             | 333 | 37.59<br>273 | 7.6<br>4 | Nucleu<br>s | - | 76                |
| CdG         | prefix06361.t1 | <i>Ceratop</i>                                                            | 585 | 64.47        | 8.4      | Nucleu      | - | 224               |

|      |                |                |     |       |     |        |   |        |
|------|----------------|----------------|-----|-------|-----|--------|---|--------|
| RF6  |                | <i>hyllum</i>  | 395 |       |     | s      |   |        |
|      |                | <i>demersu</i> |     |       |     |        |   |        |
|      |                | <i>m</i>       |     |       |     |        |   |        |
| CdG  | prefix07205.t1 | <i>Ceratop</i> | 735 | 81.64 | 9.4 | Nucleu | - | 223;   |
| RF7  |                | <i>hyllum</i>  |     | 069   | 5   | s      |   | 580;   |
|      |                | <i>demersu</i> |     |       |     |        |   | 650    |
|      |                | <i>m</i>       |     |       |     |        |   |        |
| CdG  | prefix09195.t1 | <i>Ceratop</i> | 391 | 43.26 | 6.6 | Nucleu | - | 81;    |
| RF8  |                | <i>hyllum</i>  |     | 227   | 1   | s      |   | 105    |
|      |                | <i>demersu</i> |     |       |     |        |   |        |
|      |                | <i>m</i>       |     |       |     |        |   |        |
| CdG  | prefix14436.t1 | <i>Ceratop</i> | 233 | 26.23 | 9.1 | Nucleu | - | 129    |
| RF9  |                | <i>hyllum</i>  |     | 688   | 8   | s      |   |        |
|      |                | <i>demersu</i> |     |       |     |        |   |        |
|      |                | <i>m</i>       |     |       |     |        |   |        |
| EfGR | g01483.t1      | <i>Euryale</i> | 338 | 38.00 | 8.1 | Nucleu | - | 78; 87 |
| F1   |                | <i>ferox</i>   |     | 605   | 5   | s      |   |        |
| EfGR | g09724.t1      | <i>Euryale</i> | 462 | 49.75 | 9.5 | Nucleu | - | 31     |
| F10  |                | <i>ferox</i>   |     | 375   |     | s      |   |        |
| EfGR | g11371.t1      | <i>Euryale</i> | 589 | 63.26 | 8.4 | Nucleu | - | 33;    |
| F11  |                | <i>ferox</i>   |     | 748   | 1   | s      |   | 220;   |
|      |                |                |     |       |     |        |   | 457    |
| EfGR | g12032.t1      | <i>Euryale</i> | 230 | 24.68 | 9.3 | Nucleu | - | 88     |
| F12  |                | <i>ferox</i>   |     | 304   | 2   | s      |   |        |
| EfGR | g12966.t1      | <i>Euryale</i> | 331 | 36.91 | 8.8 | Nucleu | - | 72     |
| F13  |                | <i>ferox</i>   |     | 69    | 8   | s      |   |        |
| EfGR | g16304.t1      | <i>Euryale</i> | 345 | 38.36 | 9.1 | Nucleu | - | 83     |
| F14  |                | <i>ferox</i>   |     | 869   | 7   | s      |   |        |
| EfGR | g17571.t1      | <i>Euryale</i> | 614 | 65.23 | 8.2 | Nucleu | - | 200    |
| F15  |                | <i>ferox</i>   |     | 352   | 5   | s      |   |        |
| EfGR | g17620.t1      | <i>Euryale</i> | 265 | 29.07 | 9.5 | Nucleu | - | 137    |
| F16  |                | <i>ferox</i>   |     | 685   | 1   | s      |   |        |
| EfGR | g24211.t1      | <i>Euryale</i> | 235 | 25.31 | 9.3 | Chloro | - | 109    |
| F17  |                | <i>ferox</i>   |     | 819   | 2   | plast. |   |        |
|      |                |                |     |       |     | Nucleu |   |        |
|      |                |                |     |       |     | s      |   |        |
| EfGR | g26131.t1      | <i>Euryale</i> | 310 | 35.32 | 9.0 | Nucleu | - | 76; 85 |
| F18  |                | <i>ferox</i>   |     | 833   | 5   | s      |   |        |
| EfGR | g30061.t1      | <i>Euryale</i> | 587 | 62.97 | 8.5 | Nucleu | - | 34;    |
| F19  |                | <i>ferox</i>   |     | 224   |     | s      |   | 220;   |
|      |                |                |     |       |     |        |   | 452    |
| EfGR | g03460.t2      | <i>Euryale</i> | 307 | 34.76 | 8.9 | Nucleu | - | 77; 86 |
| F2   |                | <i>ferox</i>   |     | 871   |     | s      |   |        |
| EfGR | g36593.t2      | <i>Euryale</i> | 331 | 36.81 | 8.5 | Nucleu | - | 69     |

|      |                |                 |     |       |     |        |     |        |
|------|----------------|-----------------|-----|-------|-----|--------|-----|--------|
| F20  |                | <i>ferox</i>    | 882 | 5     | s   |        |     |        |
| EfGR | g03523.t2      | <i>Euryale</i>  | 575 | 61.39 | 6.7 | Nucleu | -   | 135;   |
| F3   |                | <i>ferox</i>    | 942 | 6     | s   |        |     | 191    |
| EfGR | g03563.t1      | <i>Euryale</i>  | 273 | 29.89 | 9.2 | Nucleu | -   | 12;    |
| F4   |                | <i>ferox</i>    | 865 | 8     | s   |        |     | 139    |
| EfGR | g04250.t1      | <i>Euryale</i>  | 200 | 21.79 | 9.9 | Nucleu | -   | 59; 85 |
| F5   |                | <i>ferox</i>    | 967 | 5     | s   |        |     |        |
| EfGR | g07175.t1      | <i>Euryale</i>  | 621 | 65.57 | 7.6 | Nucleu | -   | 199    |
| F6   |                | <i>ferox</i>    | 756 |       | s   |        |     |        |
| EfGR | g07218.t1      | <i>Euryale</i>  | 274 | 30.02 | 9.3 | Nucleu | -   | 12;    |
| F7   |                | <i>ferox</i>    | 184 | 6     | s   |        |     | 13;    |
|      |                |                 |     |       |     |        |     | 139    |
| EfGR | g08094.t1      | <i>Euryale</i>  | 332 | 36.93 | 9.0 | Nucleu | -   | 72     |
| F8   |                | <i>ferox</i>    | 589 | 9     | s   |        |     |        |
| EfGR | g08916.t1      | <i>Euryale</i>  | 318 | 34.68 | 9.3 | Nucleu | -   | 84     |
| F9   |                | <i>ferox</i>    | 476 | 9     | s   |        |     |        |
| LmG  | lm5633.a03.13. | <i>lemna</i>    | 218 | 23.59 | 9.2 | Nucleu | -   | 83     |
| RF1  | g01020_p1      | <i>minuta</i>   | 446 | 7     | s   |        |     |        |
| LmG  | lm5633.a03.4.g | <i>lemna</i>    | 340 | 38.77 | 8.7 | Nucleu | -   | 94;    |
| RF2  | 01820_p1       | <i>minuta</i>   | 158 | 1     | s   |        |     | 221;   |
|      |                |                 |     |       |     |        |     | 244    |
| LmG  | lm5633.a03.8.g | <i>lemna</i>    | 261 | 28.56 | 8.8 | Chloro | 145 | 103    |
| RF3  | 10900_p1       | <i>minuta</i>   | 218 | 9     |     | plast. |     |        |
|      |                |                 |     |       |     | Nucleu |     |        |
|      |                |                 |     |       |     | s      |     |        |
| NcG  | XP_031478480   | <i>Nympha</i>   | 589 | 63.26 | 8.6 | Nucleu | -   | 34;    |
| RF1  | .1             | <i>ea</i>       | 154 |       | s   |        |     | 220;   |
|      |                | <i>colorata</i> |     |       |     |        |     | 457    |
| NcG  | XP_031482096   | <i>Nympha</i>   | 332 | 36.91 | 8.8 | Nucleu | -   | 72     |
| RF2  | .1             | <i>ea</i>       | 385 | 8     | s   |        |     |        |
|      |                | <i>colorata</i> |     |       |     |        |     |        |
| NcG  | XP_031482372   | <i>Nympha</i>   | 576 | 61.40 | 8.6 | Nucleu | -   | 219    |
| RF3  | .1             | <i>ea</i>       | 75  | 9     | s   |        |     |        |
|      |                | <i>colorata</i> |     |       |     |        |     |        |
| NcG  | XP_031491651   | <i>Nympha</i>   | 338 | 38.10 | 7.7 | Nucleu | -   | 78; 87 |
| RF4  | .1             | <i>ea</i>       | 917 |       | s   |        |     |        |
|      |                | <i>colorata</i> |     |       |     |        |     |        |
| NcG  | XP_031495439   | <i>Nympha</i>   | 297 | 31.90 | 9.1 | Nucleu | -   | 140    |
| RF5  | .1             | <i>ea</i>       | 194 | 4     | s   |        |     |        |
|      |                | <i>colorata</i> |     |       |     |        |     |        |
| NcG  | XP_031498107   | <i>Nympha</i>   | 278 | 30.23 | 9.1 | Nucleu | -   | 140    |
| RF6  | .1             | <i>ea</i>       | 004 | 5     | s   |        |     |        |
|      |                | <i>colorata</i> |     |       |     |        |     |        |
| NcG  | XP_031498261   | <i>Nympha</i>   | 412 | 46.98 | 9.1 | Nucleu | -   | 37;    |



|            |                    |                                   |     |              |          |                                                       |                                       |
|------------|--------------------|-----------------------------------|-----|--------------|----------|-------------------------------------------------------|---------------------------------------|
| RF7        | .1                 | <i>ea<br/>colorata</i>            | 986 | 7            | s        |                                                       | 40;<br>180;<br>189<br>215             |
| NcG<br>RF8 | XP_031499041<br>.1 | <i>Nympha<br/>ea<br/>colorata</i> | 645 | 68.47<br>868 | 8.4<br>7 | Nucleu<br>s                                           | -                                     |
| NcG<br>RF9 | XP_031503184<br>.1 | <i>Nympha<br/>ea<br/>colorata</i> | 333 | 36.91<br>496 | 8.9<br>2 | Nucleu<br>s                                           | -<br>69;<br>245                       |
| NnG<br>RF1 | NNU_000550-<br>RA  | <i>Nelumb<br/>o<br/>nucifera</i>  | 581 | 61.70<br>756 | 6.3<br>6 | Cell<br>membr<br>ane.<br>Cell<br>wall.<br>Nucleu<br>s | -<br>176                              |
| NnG<br>RF2 | NNU_001408-<br>RA  | <i>Nelumb<br/>o<br/>nucifera</i>  | 243 | 25.64<br>872 | 9.0<br>5 | Cell<br>membr<br>ane.<br>Nucleu<br>s                  | -<br>101                              |
| NnG<br>RF3 | NNU_002283-<br>RA  | <i>Nelumb<br/>o<br/>nucifera</i>  | 604 | 65.56<br>5   | 8.1<br>4 | Nucleu<br>s                                           | -<br>228;<br>252                      |
| NnG<br>RF4 | NNU_002395-<br>RA  | <i>Nelumb<br/>o<br/>nucifera</i>  | 380 | 41.38<br>598 | 9.0<br>5 | Nucleu<br>s                                           | -<br>142                              |
| NnG<br>RF5 | NNU_006992-<br>RA  | <i>Nelumb<br/>o<br/>nucifera</i>  | 355 | 39.77<br>916 | 8.8<br>2 | Nucleu<br>s                                           | -<br>81                               |
| NnG<br>RF6 | NNU_010640-<br>RA  | <i>Nelumb<br/>o<br/>nucifera</i>  | 372 | 42.18<br>76  | 8.6<br>1 | Nucleu<br>s                                           | -<br>78;<br>87;<br>259;<br>302<br>205 |
| NnG<br>RF7 | NNU_014113-<br>RA  | <i>Nelumb<br/>o<br/>nucifera</i>  | 550 | 58.25<br>181 | 7.5<br>3 | Cell<br>membr<br>ane.<br>Nucleu<br>s                  | -<br>79;<br>255;<br>282<br>192        |
| NnG<br>RF8 | NNU_018235-<br>RA  | <i>Nelumb<br/>o<br/>nucifera</i>  | 372 | 42.10<br>757 | 8.9<br>5 | Nucleu<br>s                                           | -                                     |
| NnG<br>RF9 | NNU_023103-<br>RA  | <i>Nelumb<br/>o</i>               | 436 | 47.47<br>062 | 7.2<br>3 | Nucleu<br>s                                           | -                                     |

|         |              |                              |     |              |           |             |   |             |  |
|---------|--------------|------------------------------|-----|--------------|-----------|-------------|---|-------------|--|
|         |              | <i>nucifera</i>              |     |              |           |             |   |             |  |
| SiGR F1 | CAA7387704.1 | <i>Spirodel a intermedia</i> | 530 | 56.36<br>808 | 8.2<br>7  | Nucleu<br>s | - | 194;<br>273 |  |
| SiGR F2 | CAA7391974.1 | <i>Spirodel a intermedia</i> | 357 | 38.15<br>435 | 8.6<br>4  | Nucleu<br>s | - | 78;<br>253  |  |
| SiGR F3 | CAA7393787.1 | <i>Spirodel a intermedia</i> | 158 | 17.22<br>233 | 10.<br>02 | Nucleu<br>s | - | 68          |  |
| SiGR F4 | CAA7394958.1 | <i>Spirodel a intermedia</i> | 300 | 33.68<br>392 | 9.2<br>1  | Nucleu<br>s | - | 86;<br>229  |  |
| SiGR F5 | CAA7399847.1 | <i>Spirodel a intermedia</i> | 203 | 21.81<br>505 | 10.<br>28 | Nucleu<br>s | - | 88;<br>176  |  |
| SiGR F6 | CAA7401268.1 | <i>Spirodel a intermedia</i> | 333 | 37.09<br>969 | 8.6<br>3  | Nucleu<br>s | - | 85          |  |
| SiGR F7 | CAA7406501.1 | <i>Spirodel a intermedia</i> | 372 | 39.37<br>449 | 8.4<br>8  | Nucleu<br>s | - | 87          |  |
| SpGR F1 | Spo001498    | <i>Spirodel a polyrhiza</i>  | 525 | 54.61<br>278 | 8.6<br>4  | Nucleu<br>s | - | 190;<br>267 |  |
| SpGR F2 | Spo004459    | <i>Spirodel a polyrhiza</i>  | 301 | 33.74<br>287 | 9.2<br>2  | Nucleu<br>s | - | 86          |  |
| SpGR F3 | Spo005290    | <i>Spirodel a polyrhiza</i>  | 559 | 59.84<br>567 | 8.7<br>4  | Nucleu<br>s | - | 47;<br>220  |  |
| SpGR F4 | Spo012722    | <i>Spirodel a polyrhiza</i>  | 402 | 41.74<br>232 | 8.7<br>9  | Nucleu<br>s | - | 90; 99      |  |

|          |                          |                                                |     |              |           |                                 |     |                     |
|----------|--------------------------|------------------------------------------------|-----|--------------|-----------|---------------------------------|-----|---------------------|
| SpGR F5  | Spo013751                | <i>a<br/>Spirodel<br/>a<br/>polyrhiz<br/>a</i> | 218 | 22.80<br>673 | 9.3       | Chloro<br>plast.<br>Nucleu<br>s | 9   | 111                 |
| SpGR F6  | Spo015563                | <i>Spirodel<br/>a<br/>polyrhiz<br/>a</i>       | 326 | 36.35<br>185 | 8.6<br>3  | Nucleu<br>s                     | -   | 86                  |
| UgG RF1  | unitig_0.g2446<br>.t1    | <i>Utrricula<br/>gibba</i>                     | 266 | 29.12<br>906 | 8.8<br>6  | Nucleu<br>s                     | 117 | -                   |
| UgG RF10 | unitig_8.g3578<br>.t1    | <i>Utrricula<br/>gibba</i>                     | 345 | 39.02<br>02  | 9.6<br>4  | Nucleu<br>s                     | -   | -                   |
| UgG RF11 | unitig_8.g4145<br>.t1    | <i>Utrricula<br/>gibba</i>                     | 300 | 32.92<br>823 | 8.6<br>7  | Nucleu<br>s                     | -   | 90                  |
| UgG RF12 | unitig_8.g4856<br>.t1    | <i>Utrricula<br/>gibba</i>                     | 454 | 48.42<br>992 | 9.0<br>6  | Nucleu<br>s                     | -   | 178                 |
| UgG RF2  | unitig_0.g2836<br>.t1    | <i>Utrricula<br/>gibba</i>                     | 672 | 73.13<br>494 | 8.8       | Nucleu<br>s                     | 301 | 45;<br>406          |
| UgG RF3  | unitig_21.g206<br>15.t1  | <i>Utrricula<br/>gibba</i>                     | 389 | 42.59<br>214 | 9.0<br>7  | Nucleu<br>s                     | -   | 65                  |
| UgG RF4  | unitig_21.g209<br>82.t1  | <i>Utrricula<br/>gibba</i>                     | 347 | 39.55<br>484 | 6.9<br>9  | Nucleu<br>s                     | -   | 104;<br>282;<br>287 |
| UgG RF5  | unitig_699.g19<br>428.t1 | <i>Utrricula<br/>gibba</i>                     | 207 | 23.90<br>758 | 10.<br>88 | Nucleu<br>s                     | -   | 81;<br>134          |
| UgG RF6  | unitig_744.g24<br>115.t1 | <i>Utrricula<br/>gibba</i>                     | 496 | 53.46<br>53  | 7.7<br>4  | Nucleu<br>s                     | -   | 169                 |
| UgG RF7  | unitig_747.g21<br>926.t1 | <i>Utrricula<br/>gibba</i>                     | 751 | 81.85<br>488 | 8.7       | Nucleu<br>s                     | -   | 91;<br>457          |
| UgG RF8  | unitig_749.g14<br>242.t1 | <i>Utrricula<br/>gibba</i>                     | 227 | 25.96<br>334 | 9.4<br>8  | Nucleu<br>s                     | -   | 97                  |
| UgG RF9  | unitig_749.g14<br>291.t1 | <i>Utrricula<br/>ria</i>                       | 290 | 31.89<br>499 | 7.7<br>6  | Nucleu<br>s                     | -   | 95                  |

|      |              |                 |     |       |     |        |      |        |  |
|------|--------------|-----------------|-----|-------|-----|--------|------|--------|--|
|      |              | <i>gibba</i>    |     |       |     |        |      |        |  |
| WaG  | Waus00004g13 | <i>Wolffia</i>  | 666 | 73.02 | 8.6 | Chloro | 519; | 248;   |  |
| RF1  | 948.1        | <i>australi</i> |     | 658   | 7   | plast  | 520; | 257;   |  |
|      |              | <i>ana</i>      |     |       |     |        | 523  | 504    |  |
| WaG  | Waus00016g05 | <i>Wolffia</i>  | 228 | 26.01 | 9.1 | Nucleu | -    | 86     |  |
| RF2  | 717.1        | <i>australi</i> |     | 245   | 5   | s      |      |        |  |
|      |              | <i>ana</i>      |     |       |     |        |      |        |  |
| WaG  | Waus00022g09 | <i>Wolffia</i>  | 478 | 51.02 | 8.8 | Cell   | -    | 189    |  |
| RF3  | 139.1        | <i>australi</i> |     | 264   | 6   | membr  |      |        |  |
|      |              | <i>ana</i>      |     |       |     | ane.   |      |        |  |
|      |              |                 |     |       |     | Nucleu |      |        |  |
|      |              |                 |     |       |     | s      |      |        |  |
| WaG  | Waus00029g11 | <i>Wolffia</i>  | 206 | 23.05 | 9.5 | Nucleu | -    | 79     |  |
| RF4  | 302.1        | <i>australi</i> |     | 058   | 3   | s      |      |        |  |
|      |              | <i>ana</i>      |     |       |     |        |      |        |  |
| WaG  | Waus00054g16 | <i>Wolffia</i>  | 219 | 23.95 | 7   | Nucleu | -    | 94     |  |
| RF5  | 188.1        | <i>australi</i> |     | 804   |     | s      |      |        |  |
|      |              | <i>ana</i>      |     |       |     |        |      |        |  |
| ZmG  | Zosma1g02640 | <i>Zostera</i>  | 552 | 60.26 | 8.3 | Nucleu | -    | 198    |  |
| RF1  | .1           | <i>marina</i>   |     | 697   | 3   | s      |      |        |  |
| ZmG  | Zosma970g000 | <i>Zostera</i>  | 495 | 53.93 | 7.6 | Nucleu | 383  | 43;    |  |
| RF10 | 20.1         | <i>marina</i>   |     | 196   | 1   | s      |      | 240    |  |
| ZmG  | Zosma2g02340 | <i>Zostera</i>  | 329 | 37.03 | 8.6 | Nucleu | -    | 93;    |  |
| RF2  | .1           | <i>marina</i>   |     | 762   | 6   | s      |      | 216;   |  |
|      |              |                 |     |       |     |        |      | 289    |  |
| ZmG  | Zosma4g01130 | <i>Zostera</i>  | 310 | 34.19 | 8.1 | Nucleu | 207  | 133    |  |
| RF3  | .1           | <i>marina</i>   |     | 019   | 8   | s      |      |        |  |
| ZmG  | Zosma8g00940 | <i>Zostera</i>  | 482 | 53.09 | 8.0 | Nucleu | 315  | 10;    |  |
| RF4  | .1           | <i>marina</i>   |     | 155   | 4   | s      |      | 212;   |  |
|      |              |                 |     |       |     |        |      | 317    |  |
| ZmG  | Zosma59g0017 | <i>Zostera</i>  | 242 | 26.98 | 8.8 | Nucleu | -    | 104    |  |
| RF5  | 0.1          | <i>marina</i>   |     | 431   | 1   | s      |      |        |  |
| ZmG  | Zosma67g0054 | <i>Zostera</i>  | 360 | 40.60 | 8.8 | Nucleu | -    | 75; 84 |  |
| RF6  | 0.1          | <i>marina</i>   |     | 547   | 4   | s      |      |        |  |
| ZmG  | Zosma81g0037 | <i>Zostera</i>  | 280 | 31.90 | 8.6 | Nucleu | -    | 101;   |  |
| RF7  | 0.1          | <i>marina</i>   |     | 561   |     | s      |      | 176    |  |
| ZmG  | Zosma120g001 | <i>Zostera</i>  | 347 | 37.60 | 8.9 | Nucleu | -    | 81; 90 |  |
| RF8  | 10.1         | <i>marina</i>   |     | 136   | 9   | s      |      |        |  |
| ZmG  | Zosma328g000 | <i>Zostera</i>  | 320 | 35.68 | 9.1 | Nucleu | -    | 82     |  |
| RF9  | 40.1         | <i>marina</i>   |     | 101   | 3   | s      |      |        |  |

---

**Table S2.** Primers used for qRT-PCR

| Name         | Sequences                 |
|--------------|---------------------------|
| SpGRF1-<br>F | CTACAAGTACCTCGACGCCAACG   |
| SpGRF1-<br>R | GGCTTCCACAGGCTTTCTTG      |
| SpGRF2-<br>F | GGTGCTTCCAAATGGGCTTCG     |
| SpGRF2-<br>R | CAGCGTAGGGATTCAGGAGA      |
| SpGRF3-<br>F | CCTTCCTCCCTGAACCTGA       |
| SpGRF3-<br>R | ACCCTGTTGGCGTCTGC         |
| SpGRF4-<br>F | GTTACGGCGTCCCAATG         |
| SpGRF4-<br>R | GGCGTTTCCACAGGCTTTCT      |
| SpGRF5-<br>F | CCCATCACTCGCTTCCCTC       |
| SpGRF5-<br>R | CGGCGGGTTTGATGCTG         |
| SpGRF6-<br>F | CCTTTCACGGCGTCTCAAT       |
| SpGRF6-<br>R | GGGACGGAGATTTCCACAGG      |
| SpACT-<br>F  | CCAGATCATGTTCGAGACCTTCAAC |
| SpACT-<br>R  | GGAGGGCGTATCCTTCGTAGATG   |
